# Supplementary material
Source: PubMed Central journal article supplement (PMC6326833)
Supplement: NIHMS997981-supplement-Figures.pdf [file NIHMS997981-supplement-Figures.pdf]

## **Supplemental Information**

### **Loss of H3K27me3 imprinting in somatic cell nuclear transfer embryos disrupts post-implantation development**

Shogo Matoba, Huihan Wang, Lan Jiang, Falong Lu, Kumiko A. Iwabuchi, Xiaoji Wu,  
Kimiko Inoue, Lin Yang, William Press, Jeannie T. Lee, Atsuo Ogura, Li Shen and Yi Zhang

#### **Contents:**

5 Supplemental figures and legends

5 Supplemental tables

## Supplemental Figures

Figure S1

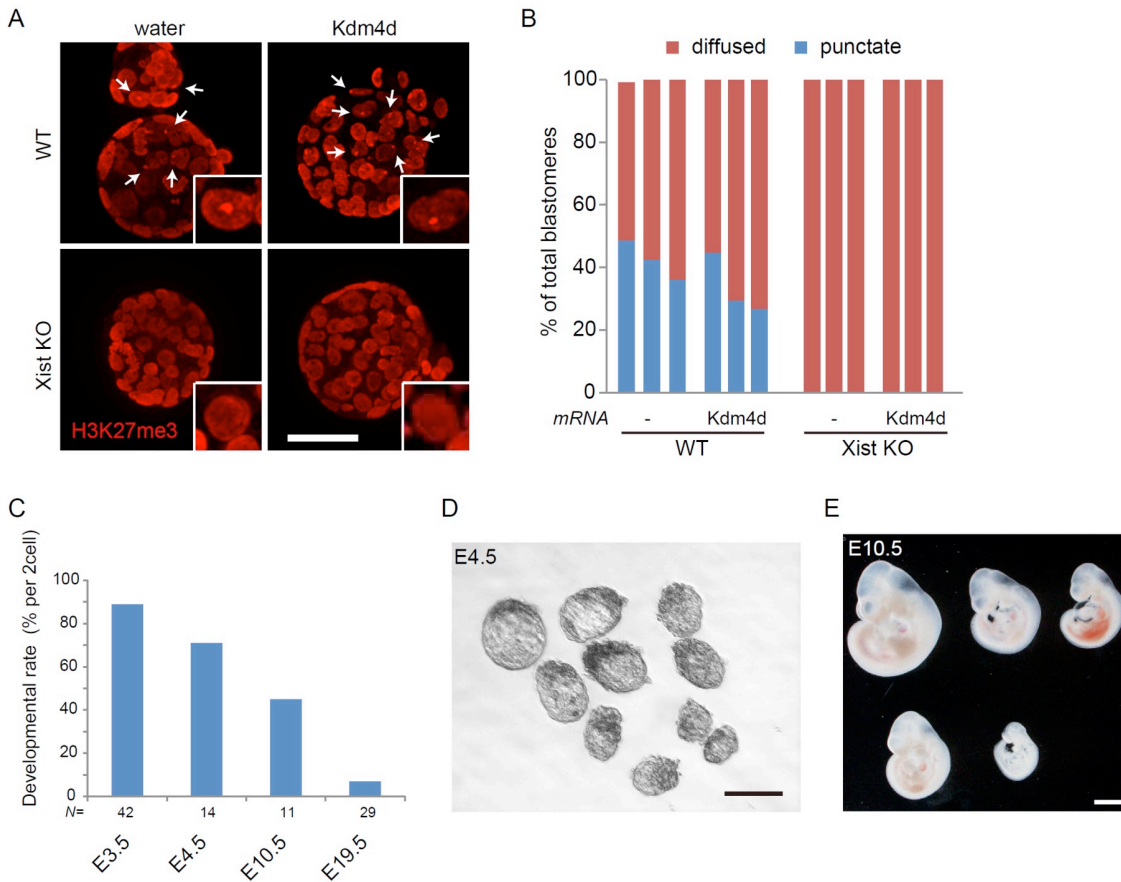

**Figure S1. Postimplantation developmental arrest of SCNT embryos, Related to Figure 1.**

- (A)** Representative images of SCNT blastocysts derived from MEF cells stained with anti-H3K27me3 antibody. Arrows indicate punctate H3K27me3 signals representing ectopically inactivated X chromosomes. Note that the ectopic XCI is not observed in SCNT embryos derived from *Xist* KO donor MEF cells. Scale bar, 50  $\mu$  m.
- (B)** Bar graphs showing the ratio of cells with or without punctate H3K27me3 signals (represent inactivated X chromosomes) in SCNT blastocysts. Each column represents a single blastocyst.
- (C)** Bar graphs showing developmental rate of SCNT embryos generated using *Xist* KO MEF cells combined with *Kdm4d* mRNA injection at the indicated time points. *N* represents the number of embryos at the 2 cell stage.
- (D and E)** Representative images of SCNT embryos collected at E4.5 (D) and E10.5 (E). Note that SCNT embryos exhibit big variation in embryo/body size at each stage. Scale bars, 100  $\mu$  m in (D) and 1mm in (E).

**Figure S2**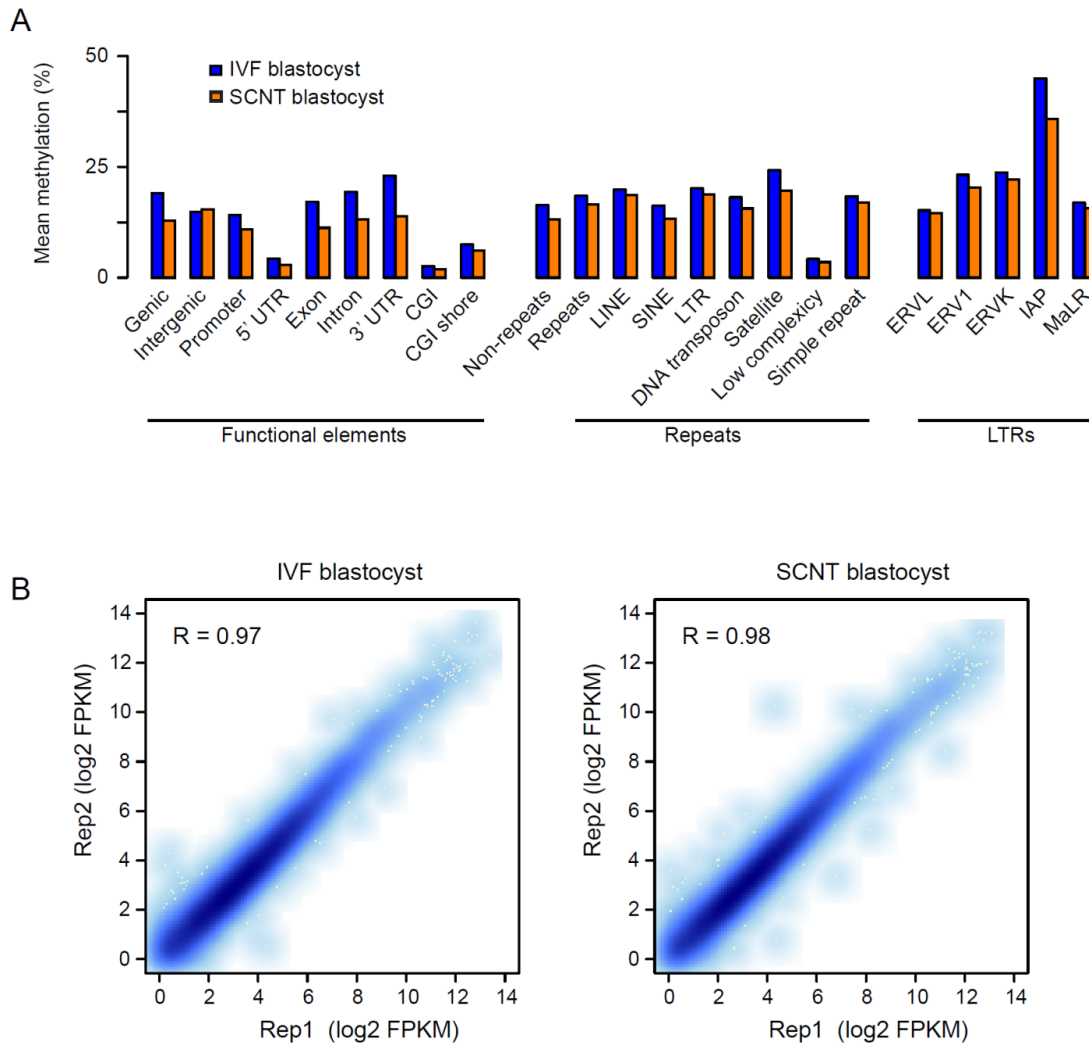

**Figure S2. SCNT and IVF blastocysts have similar DNA methylome and transcriptome**  
**Related to Figure 2**

(A) Box plots comparing mean methylation levels at various genomic features including repeats in IVF and SCNT blastocysts.

(B) Scatter plots comparing transcriptomes of biological replicates of IVF and SCNT blastocysts.

Figure S3

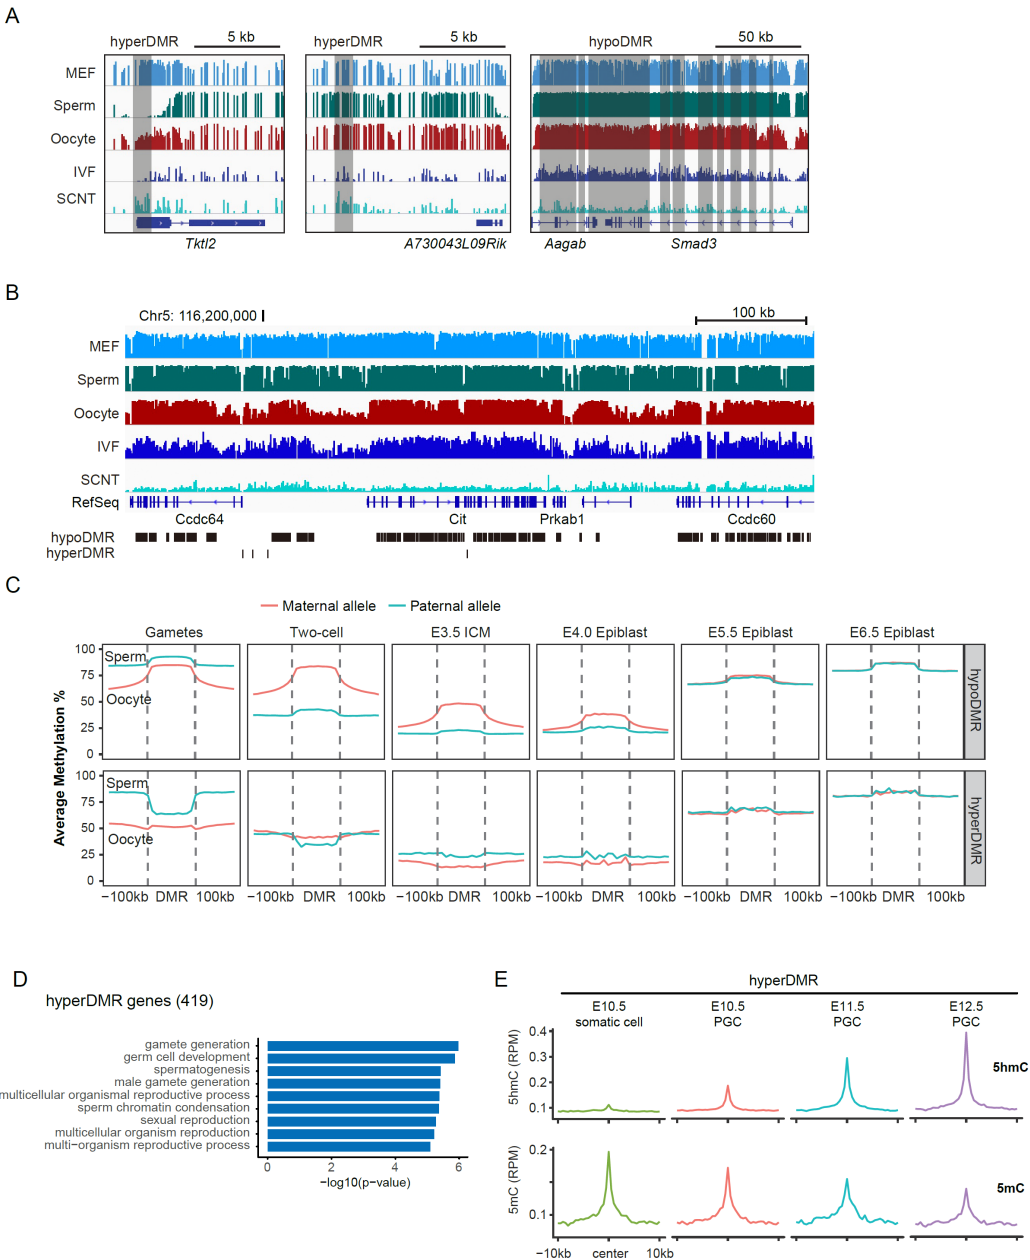**Figure S3. Features of hypo- and hyper-DMRs in SCNT blastocysts, Related to Figure 3****(A)** Representative genome browser view of hyper- and hypo-DMRs.**(B)** Representative genome browser view showing methylation peaks in oocytes overlap with those in IVF blastocysts.**(C)** Peak plots showing dynamic changes of average methylation levels at hypo- and hyper-DMRs in different developmental stages from gametes to E6.5 epiblast. Datasets used were from GSE56697 and GSE76505.**(D)** Gene ontology analysis of the hyperDMR-associated genes.**(E)** Peak plots showing mean methylation (5mC) and hydroxymethylation (5hmC) levels at hyperDMRs during PGC development. Datasets used are from SRP016940.

Figure S4

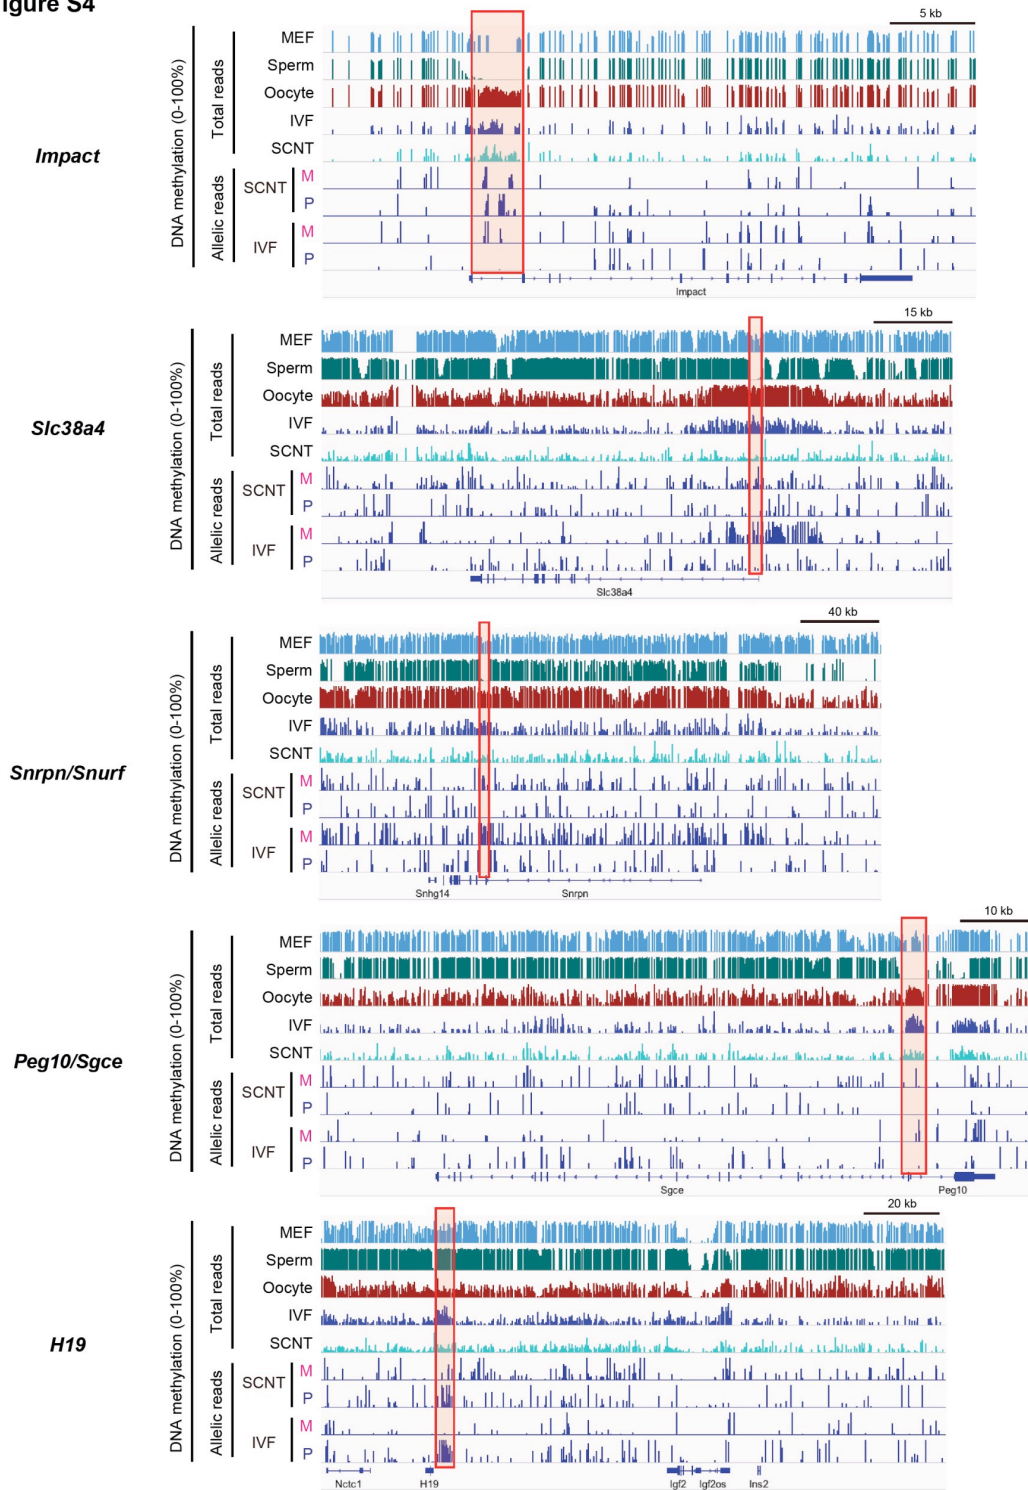

**Figure S4. Imprinting status of representative ICRs. Related to Figure 4**

Genome browser views showing DNA methylation levels at genomic regions of *Impact*-, *Slc38a4*-, *Snrpn/Snrnf*-, *Peg10/Sgce*- and *H19*-ICR. Red boxes represent ICR regions (Tomizawa et al., 2011). M; Maternal allele, P; Paternal allele.



**Figure S5. H3K27me3 distribution patterns in SCNT embryos. Related to Figure 5**

- (A) Scatter plots comparing H3K27me3 signal levels of biological replicates of IVF and SCNT morulae.
- (B) Bar graphs showing the genomic distribution of H3K27me3 peaks in IVF and SCNT morula embryo, as well as in liver, heart and MEF cells. Datasets used were from GSE49847 and GSM1624405.
- (C) Bar graphs showing the observed relative to expected H3K27me3 peaks at promoters (TSS $\pm$  1 kb).
- (D) Genome browser views of H3K27me3 signals at representative genomic regions containing H3K27me3-dependent imprinted genes, *Slc38a1*, *Slc38a2*, *Slc38a4*, *Platr4* and *Phf17*.
- (E) Genome browser views of H3K27me3 ChIP-seq signals at representative H3K27me3-dependent imprinted genes in sperm, oocytes and MEF cells. Datasets used were from GSE49847 and GSE76687.

## Supplemental Tables

Table S1. Postimplantation development of SCNT embryos, Related to Figure 1

| Donor cell |            |        |                    | mRNA injected | No. of recipients | No. of 2-cell embryos transferred | No. of implanted (% per ET) | No. of pups at birth (% per ET) | No. of pups survived to adults (% per birth) | Body weight at birth (g $\pm$ SD) | Placenta weight at birth (g $\pm$ SD) |
|------------|------------|--------|--------------------|---------------|-------------------|-----------------------------------|-----------------------------|---------------------------------|----------------------------------------------|-----------------------------------|---------------------------------------|
| cell type  | background | Sex    | <i>Xist</i> allele |               |                   |                                   |                             |                                 |                                              |                                   |                                       |
| Cumulus    | B6D2F1     | Female | WT                 | -             | 6                 | 171                               | 52 (30.4)                   | 2 (1.2)                         | 2 (100)                                      | 1.56 $\pm$ 0.04                   | 0.36 $\pm$ 0.06                       |
|            |            |        | WT                 | <i>Kdm4d</i>  | 8                 | 179                               | 110 (61.5)                  | 15 (8.4)                        | 14 (93.3)                                    | 1.59 $\pm$ 0.14                   | 0.34 $\pm$ 0.06                       |
|            |            |        | KO                 | <i>Kdm4d</i>  | 4                 | 75                                | 46 (61.3)                   | 14 (18.7)                       | 13 (92.9)                                    | 1.50 $\pm$ 0.12                   | 0.30 $\pm$ 0.04                       |
| Sertoli    | B6D2F1     | Male   | WT                 | -             | 3                 | 55                                | 25 (45.5)                   | 1 (1.8)                         | 1 (100)                                      | 1.50                              | 0.28                                  |
|            |            |        | WT                 | <i>Kdm4d</i>  | 4                 | 77                                | 47 (61.0)                   | 7 (9.1)                         | 6 (85.7)                                     | 1.45 $\pm$ 0.06                   | 0.27 $\pm$ 0.06                       |
|            |            |        | KO                 | <i>Kdm4d</i>  | 4                 | 85                                | 57 (67.1)                   | 20 (23.5)                       | 18 (90.0)                                    | 1.46 $\pm$ 0.16                   | 0.27 $\pm$ 0.08                       |
| MEF        | 129CASTF1  | Male   | WT                 | -             | 5                 | 40                                | 15 (37.5)                   | 0 (0.0)                         | N/A                                          | N/A                               | N/A                                   |
|            |            |        | WT                 | <i>Kdm4d</i>  | 5                 | 53                                | 36 (67.9)                   | 2 (3.8)                         | 1 (50.0)                                     | 1.70 $\pm$ 0.18                   | 0.38 $\pm$ 0.04                       |
|            |            |        | KO                 | <i>Kdm4d</i>  | 5                 | 29                                | 23 (79.3)                   | 2 (6.9)                         | 1 (50.0)                                     | 1.89 $\pm$ 0.25                   | 0.40 $\pm$ 0.13                       |

Concentration of injected *Kdm4d* mRNA was 1500 ng/ul. N/A, not applicable. ET, embryo transfer.



**Table S2. List of the differentially regulated genes in SCNT blastocysts, Related to Figure 2 (see excel file)**

**Table S3. List of the hypoDMRs and hyperDMRs of SCNT blastocysts, Related to Figure 3 (see excel file)**

**Table S4. DNA methylation levels at the 23 ICRs, Related to Figure 4**

| Name of ICR         | Position   |             | Average methylation level (%) |      |      |
|---------------------|------------|-------------|-------------------------------|------|------|
|                     | Chromosome | Start       | End                           | IVF  | SCNT |
| <i>H13,Mcts2</i>    | chr2       | 152,512,421 | 152,513,169                   | 34.8 | 31.6 |
| <i>Blcap,Nnat-1</i> | chr2       | 157,385,609 | 157,386,430                   | 41.8 | 25.4 |
| <i>Blcap,Nnat-2</i> | chr2       | 157,387,096 | 157,387,535                   | 21.0 | 10.6 |
| <i>Gnas-1</i>       | chr2       | 174,122,340 | 174,123,003                   | 33.1 | 26.0 |
| <i>Gnas-2</i>       | chr2       | 174,123,635 | 174,126,630                   | 30.1 | 23.9 |
| <i>Gnas-3</i>       | chr2       | 174,152,526 | 174,153,681                   | 24.8 | 14.5 |
| <i>Peg10,Sgce</i>   | chr6       | 4,696,691   | 4,698,891                     | 42.1 | 22.0 |
| <i>Mest</i>         | chr6       | 30,687,664  | 30,688,606                    | 33.8 | 24.0 |
| <i>Herc3,Nap115</i> | chr6       | 58,856,396  | 58,857,391                    | 32.8 | 34.9 |
| <i>Peg3</i>         | chr7       | 6,681,989   | 6,683,417                     | 37.6 | 32.5 |
| <i>Snrpn,Snurf</i>  | chr7       | 67,149,094  | 67,150,214                    | 43.5 | 20.3 |
| <i>Inpp5f</i>       | chr7       | 135,830,870 | 135,832,249                   | 39.4 | 31.0 |
| <i>H19</i>          | chr7       | 149,766,117 | 149,766,601                   | 37.0 | 38.8 |
| <i>Kcnq1</i>        | chr7       | 150,480,921 | 150,482,670                   | 37.1 | 24.0 |
| <i>Rasgrf1</i>      | chr9       | 89,774,382  | 89,774,897                    | 31.9 | 28.5 |
| <i>Plagl1</i>       | chr10      | 12,810,051  | 12,811,257                    | 36.6 | 29.7 |
| <i>Grb10</i>        | chr11      | 11,925,322  | 11,927,142                    | 39.8 | 21.5 |
| <i>Commd1,Zrsr1</i> | chr11      | 22,871,787  | 22,873,304                    | 40.6 | 29.5 |
| <i>Dlk1,Meg3</i>    | chr12      | 110,766,361 | 110,766,887                   | 37.2 | 22.8 |
| <i>Trappc9</i>      | chr15      | 72,639,707  | 72,641,342                    | 44.0 | 25.8 |
| <i>Slc38a4</i>      | chr15      | 96,884,723  | 96,885,730                    | 38.1 | 8.9  |
| <i>Igf2r</i>        | chr17      | 12,934,126  | 12,935,626                    | 38.0 | 31.0 |
| <i>Impact</i>       | chr18      | 13,131,236  | 13,133,240                    | 29.4 | 27.3 |

**Table S5. List of the maternal H3K27me3-domains identified in IVF morula, Related to Figure 5 (see excel file)**
